# Supplementary material for: Deep Learning-Based Universal Expert-Level Recognizing Pathological Images of Hepatocellular Carcinoma and Beyond
Source: PubMed Central journal article supplement (PMC9072864; doi:10.3389/fmed.2022.853261), 2022-04-22
Supplement: Data_Sheet_1.pdf [file Data_Sheet_1.pdf]

## *Supplementary Material*

### 1. Supplementary Figures

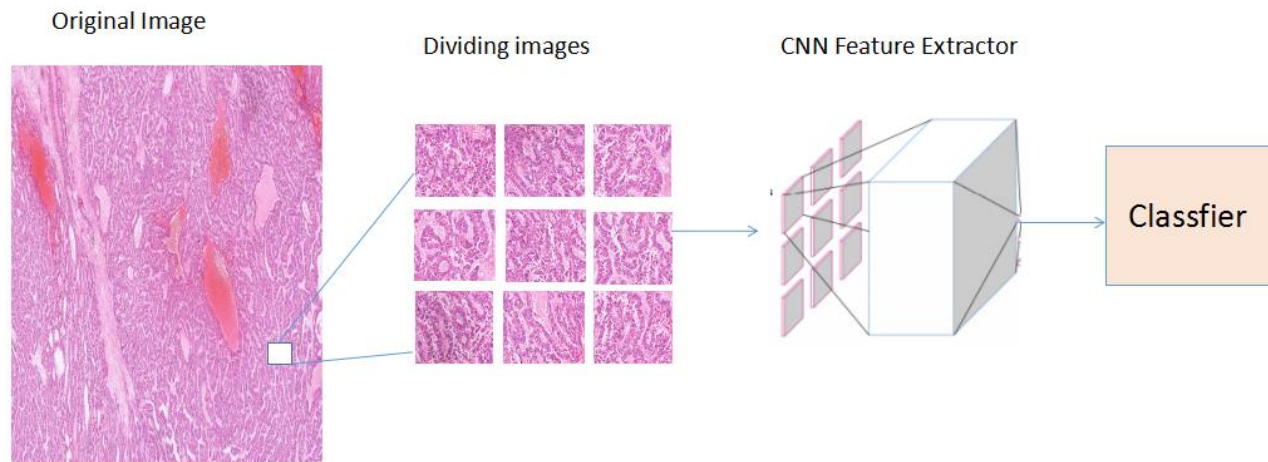

**Supplementary Figure 1.** Algorithm Architecture. Whole slide images were divided into  $n$  images, which were sent to the CNN feature extractor. Finally, the image features were determined by the constructed classifier.

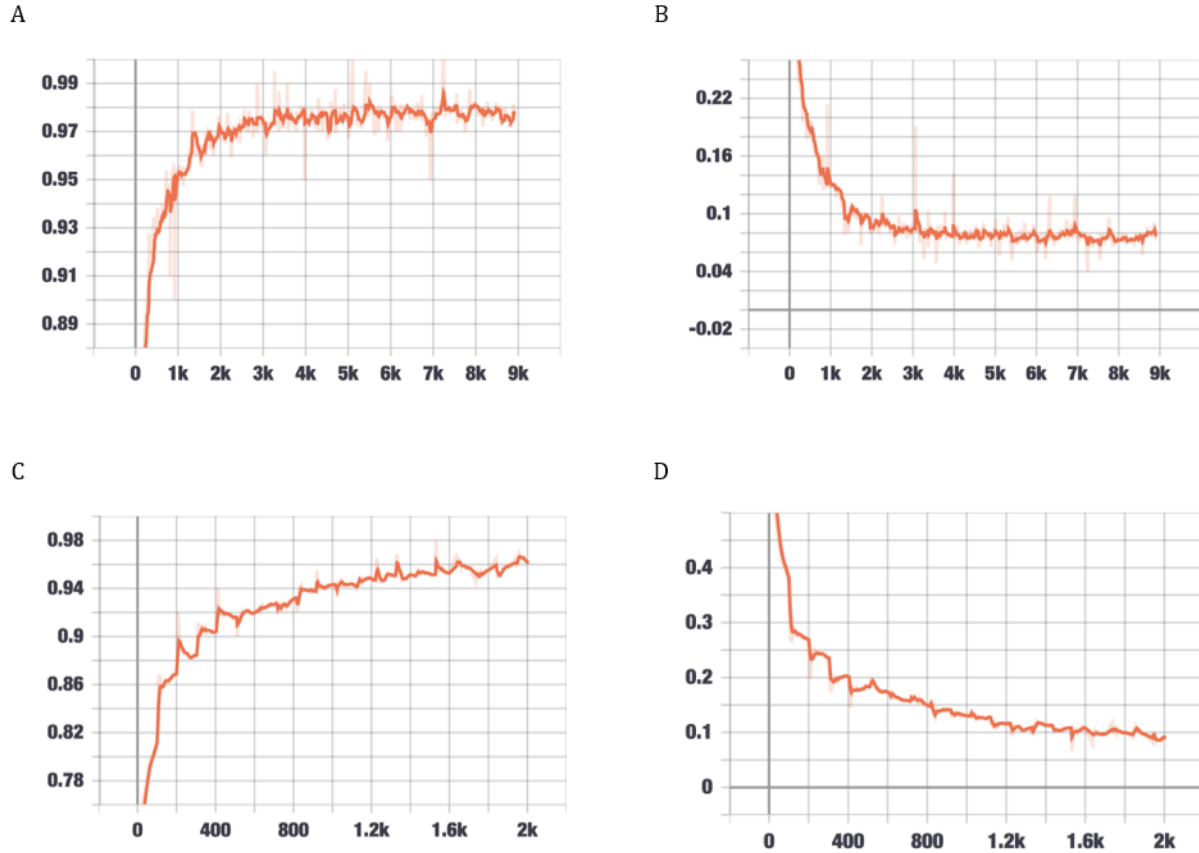

**Supplementary Figure 2.** Performance of HCC recognition during validation. (A) Classification accuracy is plotted against training epochs, and in (B), the categorical cross-entropy loss is shown as a function of training epochs for the binary classification problem. (C) Classification accuracy is plotted against validation epochs, and in (D), the categorical cross-entropy loss is shown as a function of validation epochs for the binary classification problem. The curve is smoothed.

## 2. Supplementary Tables

**Supplementary Table 1.** HCC image-recognition performance of the AI model and other architectures

|         | Sensitivity (%) | Specificity (%) | Accuracy (%) |
|---------|-----------------|-----------------|--------------|
| AlexNet | 97.0            | 95.0            | 96.0         |

|              |      |      |      |
|--------------|------|------|------|
| GoogLeNet    | 98.0 | 96.0 | 97.0 |
| Our AI Model | 99.0 | 98.0 | 98.5 |

**Supplementary Table 2.** Proposed AI framework performance in classifying other types of medical images by using transfer learning

| Images            | Accuracy (%) | Sensitivity (%) | Specificity (%) |
|-------------------|--------------|-----------------|-----------------|
| Colorectal cancer | 96.8         | 97.0            | 96.7            |
| Breast cancer     | 96.0         | 95.7            | 96.3            |

**Supplementary Table 3.** Performance of several nets at baseline

| Net          | Accuracy (%) |
|--------------|--------------|
| ResNet-34    | 98.1         |
| ResNet-50    | 97.5         |
| Inception-V4 | 97.9         |

**Supplementary Table 4.** Performance of several nets after tuning plus color augmentation

---

| Net                                       | Accuracy (%) |
|-------------------------------------------|--------------|
| ResNet-34+fine-tune+color augmentation    | 98.5         |
| ResNet-50+fine-tune+color augmentation    | 98.0         |
| Inception-v4+fine-tune+color augmentation | 98.3         |

---
